# Supplementary material for: Sleep‐disordered breathing, brain volume, and cognition in older individuals with heart failure
Source: PubMed Central journal article supplement (PMC6043704; doi:10.1002/brb3.1029), 2018-06-19
Supplement: BRB3-8-e01029-s001.pdf [file BRB3-8-e01029-s001.pdf]

Appendix. Figure A. Gray and white matter volume and apnea hypopnea index

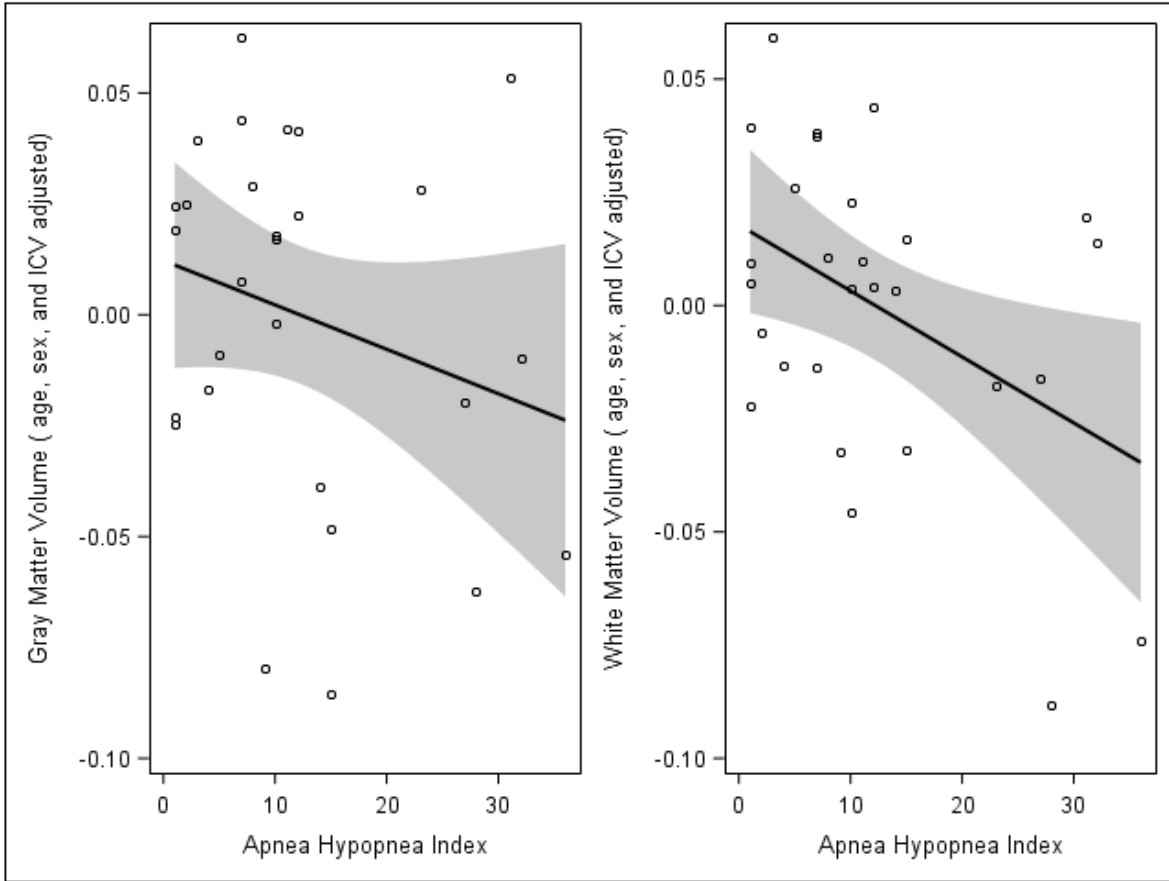

ICV = Intracranial volume.
